# Supplementary material for: Scenedesmus rubescens Heterotrophic Production Strategies for Added Value Biomass
Source: MDPI journal article supplement (doi:10.3390/md21070411), 2023-07-19
Supplement: s1 [file s1]

# Scenedesmus rubescens heterotrophic production strategies for added value biomass

Gonalo Esp rito Santo <sup>1</sup>, Ana Barros<sup>1</sup>, Margarida Costa<sup>2</sup>, Hugo Pereira<sup>3</sup>, Mafalda Trov o<sup>1</sup>, Helena Cardoso<sup>1</sup>, Bernardo Carvalho<sup>3</sup>, Maria Soares<sup>1</sup>, N dia Correia<sup>1</sup>, Joana T. Silva<sup>1</sup>, Mar lia Mateus<sup>4</sup> and Joana Silva<sup>1</sup>

<sup>1</sup> Allmicroalgae Natural Products S.A., R&D Department, Rua 25 de Abril s/n, 2445-413 Pataias, Portugal;

<sup>2</sup> Microalgae section, Norwegian Institute for Water Research (NIVA),  kemveien 94, 0579 Oslo, Norway

<sup>3</sup> GreenCoLab—Associa  o Oceano Verde, University of Algarve, Campus de Gambelas, 8005-139 Faro, Portugal

<sup>4</sup> iBB—Institute for Bioengineering and Biosciences, Instituto Superior T cnico, Universidade de Lisboa, Av. Rovisco Pais, 1049-001 Lisbon, Portugal; [marilia.mateus@tecnico.ulisboa.pt](mailto:marilia.mateus@tecnico.ulisboa.pt)

\* Correspondence: [marilia.mateus@tecnico.ulisboa.pt](mailto:marilia.mateus@tecnico.ulisboa.pt) (M.M.)

## Supplementary information

**Table S1** - Screening method by Plackett-Burman design in actual level of variables through Minitab  software for *Scenedesmus rubescens*

| Trial | Nitrogen source | Concentration (mM) |      |     |     |      |      |       |      |       |       |      |     |
|-------|-----------------|--------------------|------|-----|-----|------|------|-------|------|-------|-------|------|-----|
|       |                 | N                  | Mg   | Ca  | P   | Fe   | Cu   | Zn    | Mn   | Mo    | Co    | Ni   | B   |
| 1     | Ammonium        | 40                 | 1.75 | 1   | 5.5 | 0.06 | 0.03 | 0.032 | 0.06 | 0.011 | 0.013 | 0.01 | 0.3 |
| 2     | Ammonium        | 40                 | 1.75 | 1   | 5.5 | 0.06 | 0.03 | 0.032 | 0.06 | 0.011 | 0.013 | 0.01 | 0.3 |
| 3     | Nitrate         | 60                 | 3    | 0.3 | 1   | 0.1  | 0.06 | 0.003 | 0.08 | 0.020 | 0.005 | 0    | 0.1 |
| 4     | Nitrate         | 20                 | 3    | 0.3 | 10  | 0.1  | 0.06 | 0.060 | 0.03 | 0.001 | 0.020 | 0.02 | 0.1 |
| 5     | Ammonium        | 20                 | 0.5  | 0.3 | 10  | 0.02 | 0.06 | 0.003 | 0.08 | 0.020 | 0.020 | 0.02 | 0.1 |
| 6     | Nitrate         | 60                 | 0.5  | 0.3 | 10  | 0.1  | 0.01 | 0.060 | 0.08 | 0.001 | 0.005 | 0    | 0.1 |
| 7     | Nitrate         | 60                 | 0.5  | 1.7 | 10  | 0.02 | 0.01 | 0.003 | 0.03 | 0.020 | 0.005 | 0.02 | 0.1 |
| 8     | Ammonium        | 60                 | 0.5  | 1.7 | 10  | 0.1  | 0.06 | 0.003 | 0.03 | 0.020 | 0.020 | 0    | 0.5 |
| 9     | Ammonium        | 60                 | 3    | 0.3 | 10  | 0.1  | 0.01 | 0.003 | 0.03 | 0.001 | 0.020 | 0    | 0.5 |
| 10    | Ammonium        | 20                 | 3    | 0.3 | 10  | 0.02 | 0.06 | 0.060 | 0.08 | 0.020 | 0.005 | 0    | 0.5 |
| 11    | Ammonium        | 20                 | 0.5  | 0.3 | 1   | 0.02 | 0.01 | 0.003 | 0.03 | 0.001 | 0.005 | 0    | 0.1 |
| 12    | Nitrate         | 40                 | 1.75 | 1   | 5.5 | 0.06 | 0.03 | 0.032 | 0.06 | 0.011 | 0.013 | 0.01 | 0.3 |
| 13    | Ammonium        | 60                 | 3    | 1.7 | 10  | 0.02 | 0.01 | 0.060 | 0.08 | 0.001 | 0.020 | 0.02 | 0.1 |
| 14    | Nitrate         | 20                 | 3    | 1.7 | 10  | 0.1  | 0.01 | 0.003 | 0.08 | 0.020 | 0.005 | 0.02 | 0.5 |
| 15    | Nitrate         | 40                 | 1.75 | 1   | 5.5 | 0.06 | 0.03 | 0.032 | 0.06 | 0.011 | 0.013 | 0.01 | 0.3 |
| 16    | Nitrate         | 20                 | 0.5  | 1.7 | 10  | 0.02 | 0.06 | 0.060 | 0.03 | 0.001 | 0.005 | 0    | 0.5 |
| 17    | Nitrate         | 60                 | 3    | 1.7 | 1   | 0.02 | 0.06 | 0.060 | 0.03 | 0.020 | 0.020 | 0    | 0.1 |
| 18    | Nitrate         | 40                 | 1.75 | 1   | 5.5 | 0.06 | 0.03 | 0.032 | 0.06 | 0.011 | 0.013 | 0.01 | 0.3 |
| 19    | Ammonium        | 40                 | 1.75 | 1   | 5.5 | 0.06 | 0.03 | 0.032 | 0.06 | 0.011 | 0.013 | 0.01 | 0.3 |
| 20    | Nitrate         | 40                 | 1.75 | 1   | 5.5 | 0.06 | 0.03 | 0.032 | 0.06 | 0.011 | 0.013 | 0.01 | 0.3 |
| 21    | Ammonium        | 60                 | 0.5  | 1.7 | 1   | 0.1  | 0.06 | 0.060 | 0.08 | 0.001 | 0.005 | 0.02 | 0.5 |
| 22    | Ammonium        | 20                 | 3    | 1.7 | 1   | 0.1  | 0.06 | 0.003 | 0.03 | 0.001 | 0.005 | 0.02 | 0.1 |
| 23    | Ammonium        | 20                 | 0.5  | 1.7 | 1   | 0.1  | 0.01 | 0.060 | 0.08 | 0.020 | 0.020 | 0    | 0.1 |
| 24    | Ammonium        | 40                 | 1.75 | 1   | 5.5 | 0.06 | 0.03 | 0.032 | 0.06 | 0.011 | 0.013 | 0.01 | 0.3 |
| 25    | Ammonium        | 40                 | 1.75 | 1   | 5.5 | 0.06 | 0.03 | 0.032 | 0.06 | 0.011 | 0.013 | 0.01 | 0.3 |
| 26    | Ammonium        | 40                 | 1.75 | 1   | 5.5 | 0.06 | 0.03 | 0.032 | 0.06 | 0.011 | 0.013 | 0.01 | 0.3 |
| 27    | Nitrate         | 60                 | 0.5  | 0.3 | 1   | 0.02 | 0.06 | 0.003 | 0.08 | 0.001 | 0.020 | 0.02 | 0.5 |
| 28    | Ammonium        | 60                 | 3    | 0.3 | 1   | 0.02 | 0.01 | 0.060 | 0.03 | 0.020 | 0.005 | 0.02 | 0.5 |
| 29    | Nitrate         | 20                 | 3    | 1.7 | 1   | 0.02 | 0.01 | 0.003 | 0.08 | 0.001 | 0.020 | 0    | 0.5 |
| 30    | Nitrate         | 20                 | 0.5  | 0.3 | 1   | 0.1  | 0.01 | 0.060 | 0.03 | 0.020 | 0.020 | 0.02 | 0.5 |

**Table S2** - Responses functions for screening method composition for heterotrophic cultivation of *Scenedesmus rubescens*. Minitab® software was used

| <b>Trials</b> | <b>Biomass concentration (g/L)</b> | <b>Global productivity (g/L/day)</b> | <b>Maximum productivity (g/L/day)</b> |
|---------------|------------------------------------|--------------------------------------|---------------------------------------|
| 1             | 9.62                               | 0.089                                | 0.277                                 |
| 2             | 6.50                               | 0.060                                | 0.142                                 |
| 3             | 4.41                               | 0.041                                | 0.079                                 |
| 4             | 12.09                              | 0.112                                | 1.243                                 |
| 5             | 13.82                              | 0.128                                | 0.344                                 |
| 6             | 6.90                               | 0.064                                | 0.176                                 |
| 7             | 10.77                              | 0.100                                | 1.114                                 |
| 8             | 9.79                               | 0.091                                | 0.166                                 |
| 9             | 7.31                               | 0.061                                | 0.131                                 |
| 10            | 7.55                               | 0.070                                | 0.150                                 |
| 11            | 6.43                               | 0.060                                | 0.142                                 |
| 12            | 9.62                               | 0.089                                | 0.277                                 |
| 13            | 11.51                              | 0.091                                | 0.560                                 |
| 14            | 14.73                              | 0.136                                | 1.235                                 |
| 15            | 9.21                               | 0.085                                | 0.322                                 |
| 16            | 12.34                              | 0.114                                | 1.206                                 |
| 17            | 6.02                               | 0.056                                | 0.109                                 |
| 18            | 9.21                               | 0.085                                | 0.322                                 |
| 19            | 6.50                               | 0.060                                | 0.133                                 |
| 20            | 9.21                               | 0.085                                | 0.322                                 |
| 21            | 4.33                               | 0.040                                | 0.081                                 |
| 22            | 5.04                               | 0.047                                | 0.093                                 |
| 23            | 5.35                               | 0.050                                | 0.120                                 |
| 24            | 6.91                               | 0.064                                | 0.152                                 |
| 25            | 6.50                               | 0.060                                | 0.133                                 |
| 26            | 6.91                               | 0.064                                | 0.152                                 |
| 27            | 4.91                               | 0.045                                | 0.096                                 |
| 28            | 3.81                               | 0.035                                | 0.059                                 |
| 29            | 6.08                               | 0.056                                | 0.212                                 |
| 30            | 7.53                               | 0.0697                               | 0.150                                 |

**Table S3** – Optimized culture medium developed in this work for *Scenedesmus rubescens* (macro and micronutrients)

| <b>0037 SA medium</b>                                |                               |
|------------------------------------------------------|-------------------------------|
| <b>Component</b>                                     | <b>Concentration<br/>(mM)</b> |
| (NH <sub>4</sub> ) <sub>2</sub> SO <sub>4</sub>      | 60                            |
| NaH <sub>2</sub> PO <sub>4</sub>                     | 26                            |
| K <sub>2</sub> HPO <sub>4</sub>                      | 24                            |
| MgSO <sub>4</sub> .7H <sub>2</sub> O                 | 1.75                          |
| Citric acid                                          | 6.25                          |
| FeSO <sub>4</sub> .7H <sub>2</sub> O                 | 0.06                          |
| CaCl <sub>2</sub> .2H <sub>2</sub> O                 | 0.3                           |
| H <sub>3</sub> BO <sub>3</sub>                       | 0.1                           |
| ZnSO <sub>4</sub>                                    | 0.003                         |
| MnCl <sub>2</sub> .4H <sub>2</sub> O                 | 0.03                          |
| Na <sub>2</sub> Mo <sub>4</sub> .2H <sub>2</sub> O   | 0.03                          |
| CuSO <sub>4</sub> .2H <sub>2</sub> O                 | 0.00325                       |
| NiCl <sub>2</sub> .6H <sub>2</sub> O                 | 0.02                          |
| Co(NO <sub>3</sub> ) <sub>2</sub> .6H <sub>2</sub> O | 0.01                          |

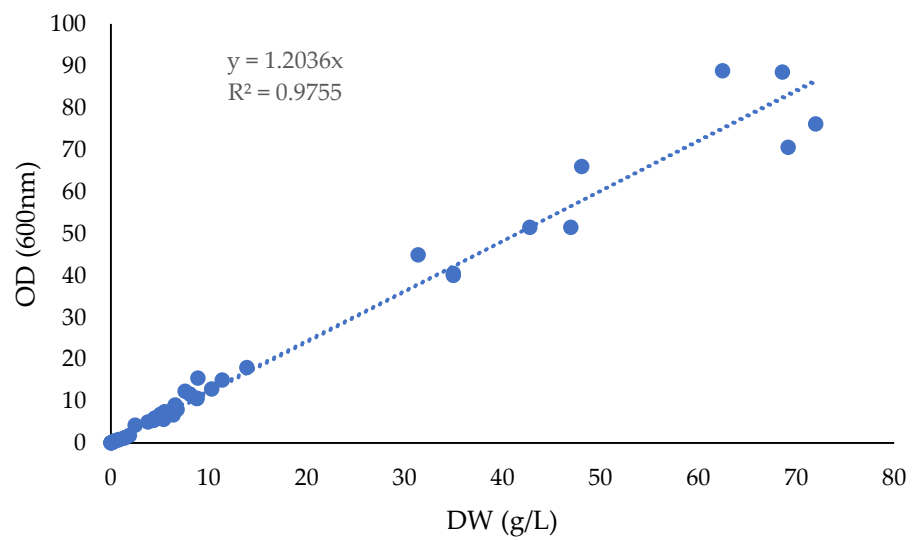

**Figure S1** – Calibration Curve. Optical density of *S. rubescens* suspensions (in water) measured at  $\lambda = 600$  nm versus dry biomass concentration (g/L), for heterotrophic growth.
